# Supplementary material for: Can Glycosylation Mask the Detection of MHC Expressing p53 Peptides by T Cell Receptors?
Source: MDPI journal article supplement (doi:10.3390/biom11071056), 2021-07-19
Supplement: s1 [file s1]

# Can Glycosylation Mask the Detection of MHC Expressing p53 Peptides by T Cell Receptors?

Thanh Binh Nguyen <sup>1</sup>, David P. Lane <sup>2</sup> and Chandra S. Verma <sup>1,3,4,\*</sup>

<sup>1</sup> Division of Biomolecular Structure to Mechanism, Bioinformatics Institute, Agency for Science, Technology and Research (A\*STAR), Singapore 138671, Singapore; [nguyenbinhchem@gmail.com](mailto:nguyenbinhchem@gmail.com)

<sup>2</sup> p53 Laboratory, Agency for Science, Technology and Research (A\*STAR), Singapore 138648, Singapore; [dplane@imcb.a-star.edu.sg](mailto:dplane@imcb.a-star.edu.sg)

<sup>3</sup> School of Biological Sciences, College of Science, Nanyang Technological University, Singapore 637551, Singapore

<sup>4</sup> Department of Biological Sciences, Faculty of Science, National University of Singapore, Singapore 117543, Singapore

\* Correspondence: [chandra@bii.a-star.edu.sg](mailto:chandra@bii.a-star.edu.sg); Tel.: +65-6478-8273; Fax: +65-6478-9048

**Table S1.** The lifetime of hbond interactions between A24 and TCR in the A24-peptide-TCR where the peptides are p161, Galp161, and Glcp161.

| A24-p161-TCR    |                |             |              |                |             |              |
|-----------------|----------------|-------------|--------------|----------------|-------------|--------------|
| A24             |                |             | TCR          |                |             | Lifetime (%) |
| Residue Name    | Residue Number | Atom Number | Residue Name | Residue Number | Atom Number |              |
| GLU             | 62             | OE1         | GLN          | a-94           | NE2         | 18           |
| LYS             | 66             | NZ          | GLN          | a-94           | OE1         | 28           |
| GLN             | 72             | O           | ASN          | b-51           | ND2         | 32           |
| GLN             | 72             | NE2         | ASN          | b-51           | OD1         | 12           |
| GLN             | 72             | NE2         | VAL          | b-52           | O           | 46           |
| GLN             | 72             | NE2         | ASP          | b-56           | OD1         | 14           |
| THR             | 73             | OG1         | ASN          | b-51           | ND2         | 56           |
| GLN             | 155            | NE2         | TYR          | a-51           | OH          | 31           |
| GLN             | 155            | NE2         | SER          | b-97           | OG          | 29           |
| GLN             | 155            | OE1         | HID          | b-98           | N           | 51           |
| GLU             | 62             | OE1         | LYS          | b-57           | NZ          | 28           |
| LYS             | 66             | NZ          | ASP          | b-56           | OD1         | 19           |
| LYS             | 68             | NZ          | ASP          | b-56           | OD2         | 25           |
| GLU             | 161            | OE2         | ARG          | a-28           | NH2         | 23           |
| ASP             | 166            | OD2         | ARG          | a-28           | NH2         | 48           |
| A24-Galp161-TCR |                |             |              |                |             |              |
| GLU             | 62             | OE1         | GLN          | a-94           | NE2         | 21           |
| GLY             | 65             | O           | ASN          | b-51           | ND2         | 13           |
| LYS             | 66             | NZ          | GLN          | a-94           | O           | 26           |
| HIE             | 70             | NE2         | GLY          | a-95           | O           | 31           |
| GLN             | 72             | NE2         | VAL          | b-52           | O           | 20           |
| GLU             | 154            | OE1         | SER          | a-32           | N           | 21           |
| GLU             | 154            | OE1         | SER          | a-52           | OG          | 23           |
| GLN             | 155            | OE1         | SER          | a-32           | OG          | 36           |
| GLN             | 155            | NE2         | SER          | a-32           | OG          | 20           |
| GLN             | 155            | NE2         | HID          | b-98           | ND1         | 13           |
| ARG             | 157            | NH1         | ARG          | a-28           | O           | 38           |
| THR             | 163            | OG1         | GLN          | a-31           | NE2         | 24           |
| THR             | 163            | OG1         | GLN          | a-94           | OE1         | 18           |
| GLU             | 58             | OE1         | LYS          | b-57           | NZ          | 13           |
| GLU             | 62             | OE1         | LYS          | b-57           | NZ          | 33           |
| GLU             | 154            | OE1         | LYS          | a-67           | NZ          | 17           |

|                        |     |     |     |      |     |     |
|------------------------|-----|-----|-----|------|-----|-----|
| GLU                    | 161 | OE1 | LYS | a-67 | NZ  | 62  |
| ASP                    | 166 | OD1 | ARG | a-28 | NH2 | 100 |
| GLU                    | 173 | OE1 | ARG | a-28 | NH1 | 34  |
| <b>A24-Glcp161-TCR</b> |     |     |     |      |     |     |
| GLN                    | 72  | O   | ASN | b-51 | ND2 | 33  |
| GLU                    | 76  | OE2 | ASN | b-51 | ND2 | 33  |
| GLU                    | 154 | OE1 | SER | a-52 | OG  | 34  |
| GLN                    | 155 | OE1 | GLN | a-31 | NE2 | 11  |
| GLN                    | 156 | NE2 | SER | a-32 | OG  | 34  |
| GLN                    | 72  | NE2 | GLU | b-29 | OE2 | 10  |
| GLN                    | 72  | NE2 | ASP | b-55 | OD1 | 27  |
| GLN                    | 156 | NE2 | SER | b-97 | OG  | 12  |
| GLN                    | 156 | NE2 | HID | b-98 | NE2 | 22  |
| GLU                    | 154 | OE1 | LYS | a-67 | NZ  | 16  |
| ASP                    | 166 | OD1 | ARG | a-28 | NH2 | 33  |
| LYS                    | 68  | NZ  | ASP | b-56 | OD2 | 27  |

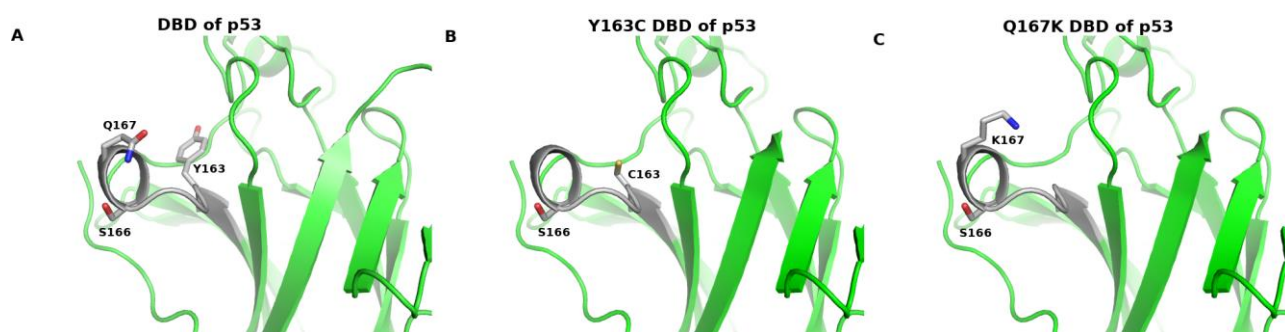

**Figure S1.** The DBD of p53 (green cartoon) taken from a monomer of its dimer of dimers complex with two fragments of decameric DNA (PDB ID: 2AHI, resolution 1.8 Å). The wild type protein is shown in (A) with the two sites of mutations (Y163 and Q167), the region 161–169 corresponding to p161 is shown in grey ribbon and the site of glycosylation S166 is shown in sticks. (B) the mutation Y163C is shown in sticks and it is clear that it does not occlude S166; (C) the mutation Q167K is shown in sticks and it is clear that it does not occlude S166; p161 is highlighted in grey; C atoms are shown in grey, Oxygen atoms are shown in red and Nitrogen atoms are shown in blue.

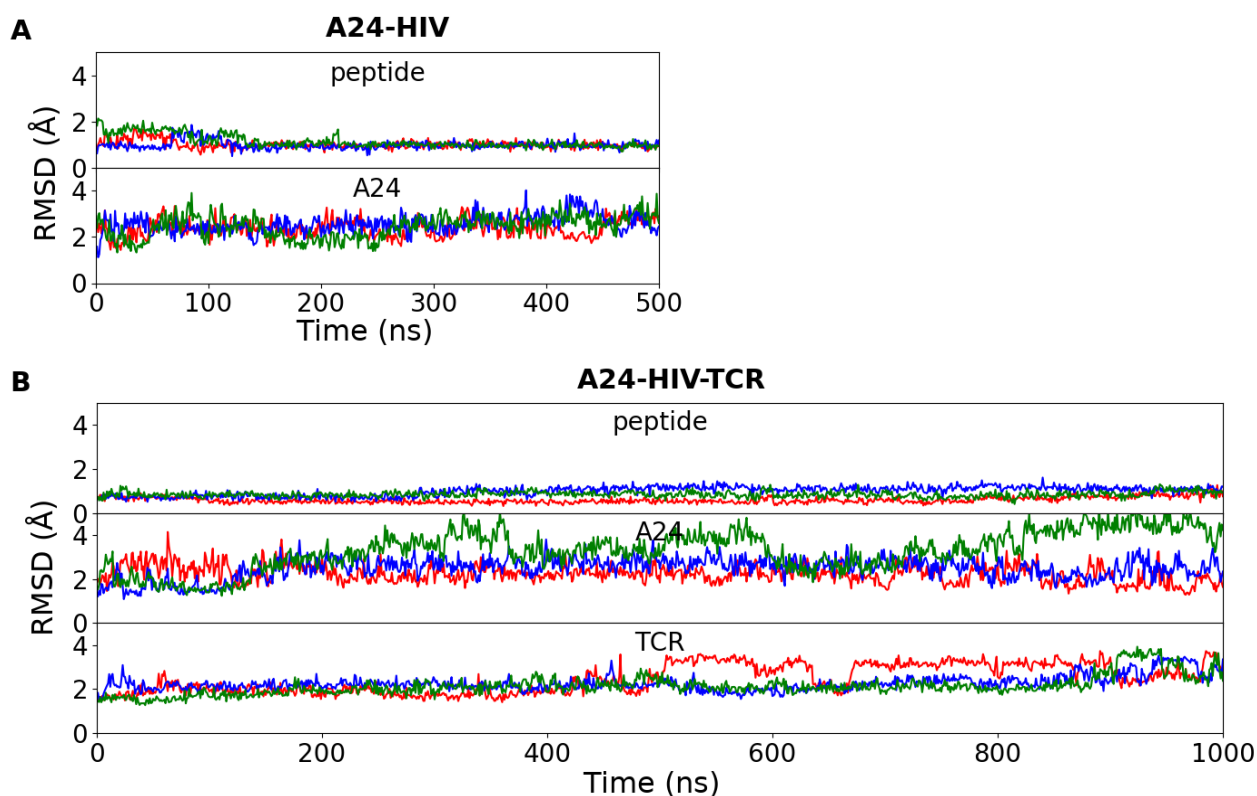

**Figure S2.** C $\alpha$  RMSD values of the HIV peptide in complex with A24 in the (A) absence and (B) presence of TCR over 500 ns and 1000 ns of MD simulations, respectively. The RMSD values shown in Å correspond to different parts of the complexes; peptide (first row), A24 (second row) and the  $\alpha$  and  $\beta$  chains TCR (third row); red, blue, and green colors represent the different replicates.

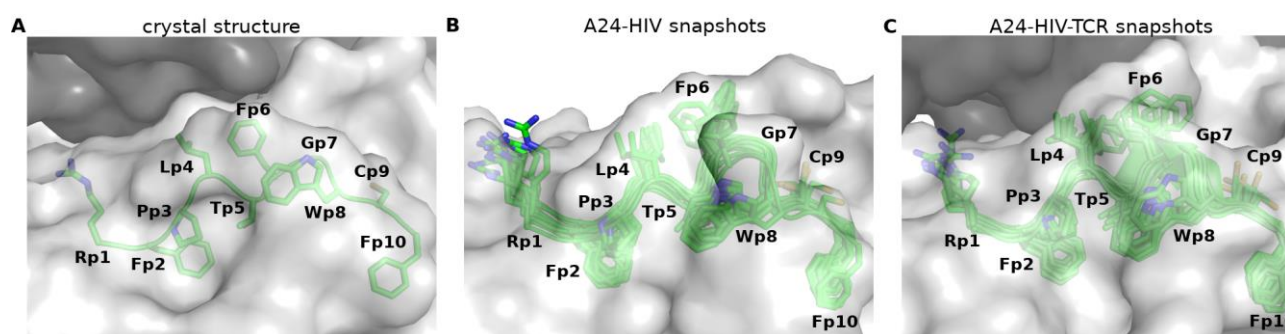

**Figure S3.** (A) Location of the HIV peptide in the crystal structure of the A24-HIV-TCR complex (PDB ID: 3VXU, resolution 2.7 Å); (B) Nine snapshots from the MD simulations of the binary complex of A24 with the HIV peptide (snapshots taken at 300, 400, and 500 ns of each MD simulation from the triplicate); and (C) Nine snapshots from the MD simulations of the ternary complex of A24 with the HIV peptide and TCR (snapshots taken at 800, 900, and 1000 ns of each MD simulation from the triplicate); A24 is in grey surface, TCR is in dark grey surface and HIV peptide is in green sticks, with Oxygen atoms in red and Nitrogen atoms in blue.

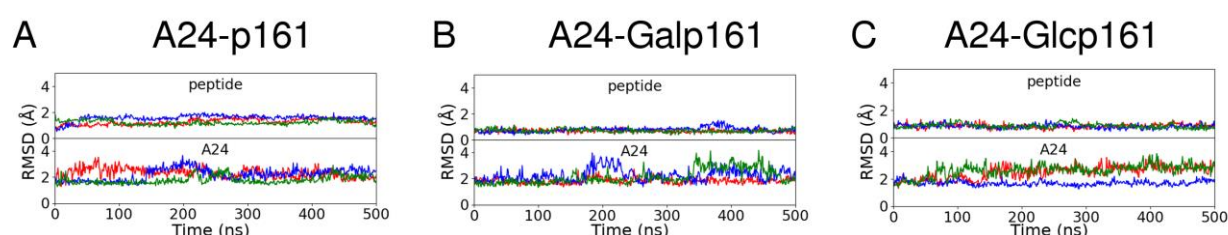

**Figure S4.** C $\alpha$  RMSD values of the A24-peptide complexes where the peptides are (A) p161, (B) Galp161, and (C) Glcp161 during 500 ns triplicate MD simulations. The RMSD values correspond to different parts of the A24-peptide complexes, namely, all residues of the peptide (first row), and all residues of A24 (second row); red, blue, and green colors represent the different replicates.

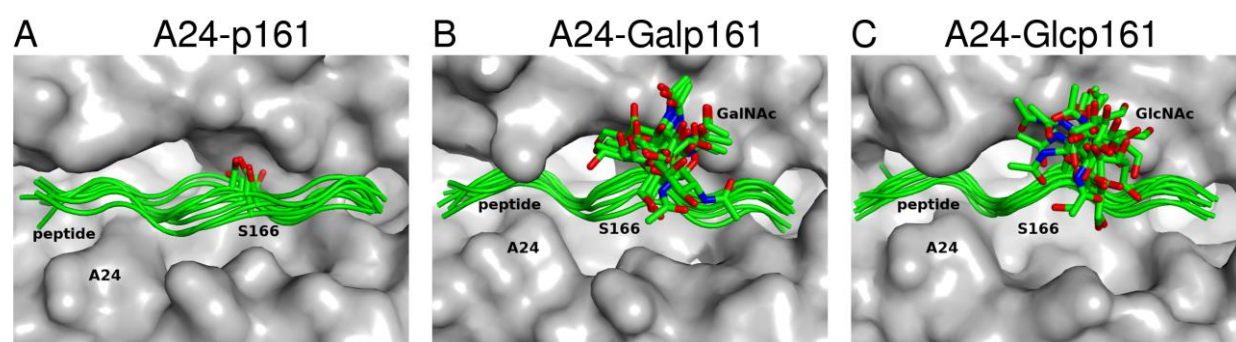

**Figure S5.** Conformations sampled by the p53 peptides complexed to A24 during the MD simulations of the binary A24-peptide complexes: (A) p161, (B) Galp161, and (C) Glcp161; Nine snapshots of the peptide are shown in each panel, with the conformations extracted at 300, 400, and 500 ns of each of the triplicate MD simulations. A24 is in grey surface, p53 peptide is in green ribbon, residue S166 and the sugars are shown in sticks with Oxygen atoms in red and Nitrogen atoms in blue.

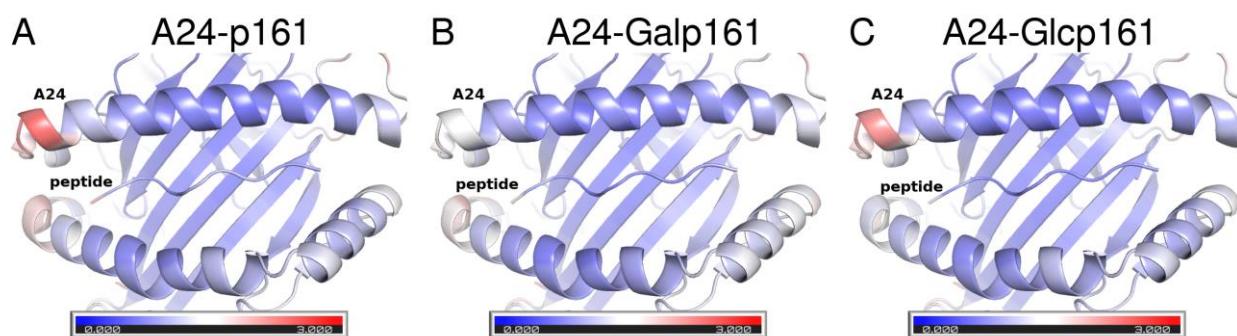

**Figure S6.**  $C^\alpha$  RMSF of the binary complexes of A24 and the p161 peptides: peptides are (A) p161, (B) Galp161, and (C) Glcp161 during the last 200 ns of the MD simulations. RMSF values are coloured from very low (blue) to 3 Å (red).

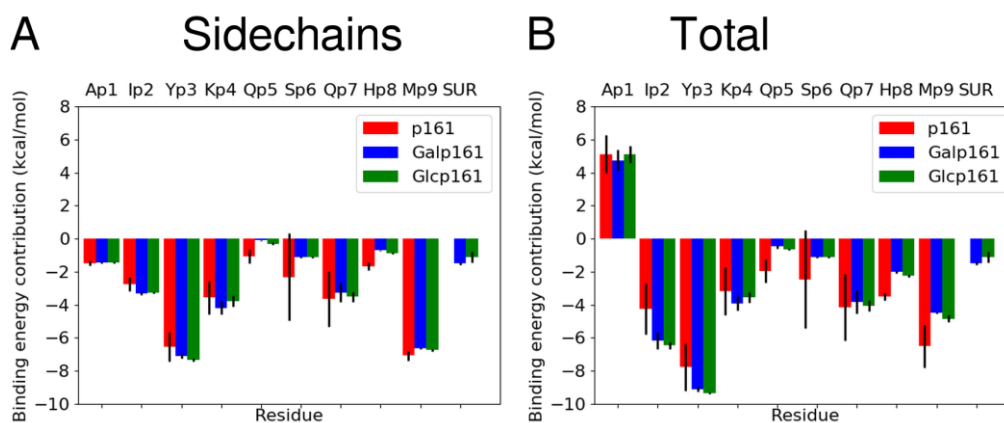

**Figure S7.** The contributions of (A) sidechains and (B) both sidechains and backbone atoms of the peptide residues to the total binding energies with A24 during the last 200 ns of the 500 ns triplicate MD simulations. Red, blue and green colors represent p161, Galp161, and Glcp161 respectively. Standard deviations are shown in error bars.

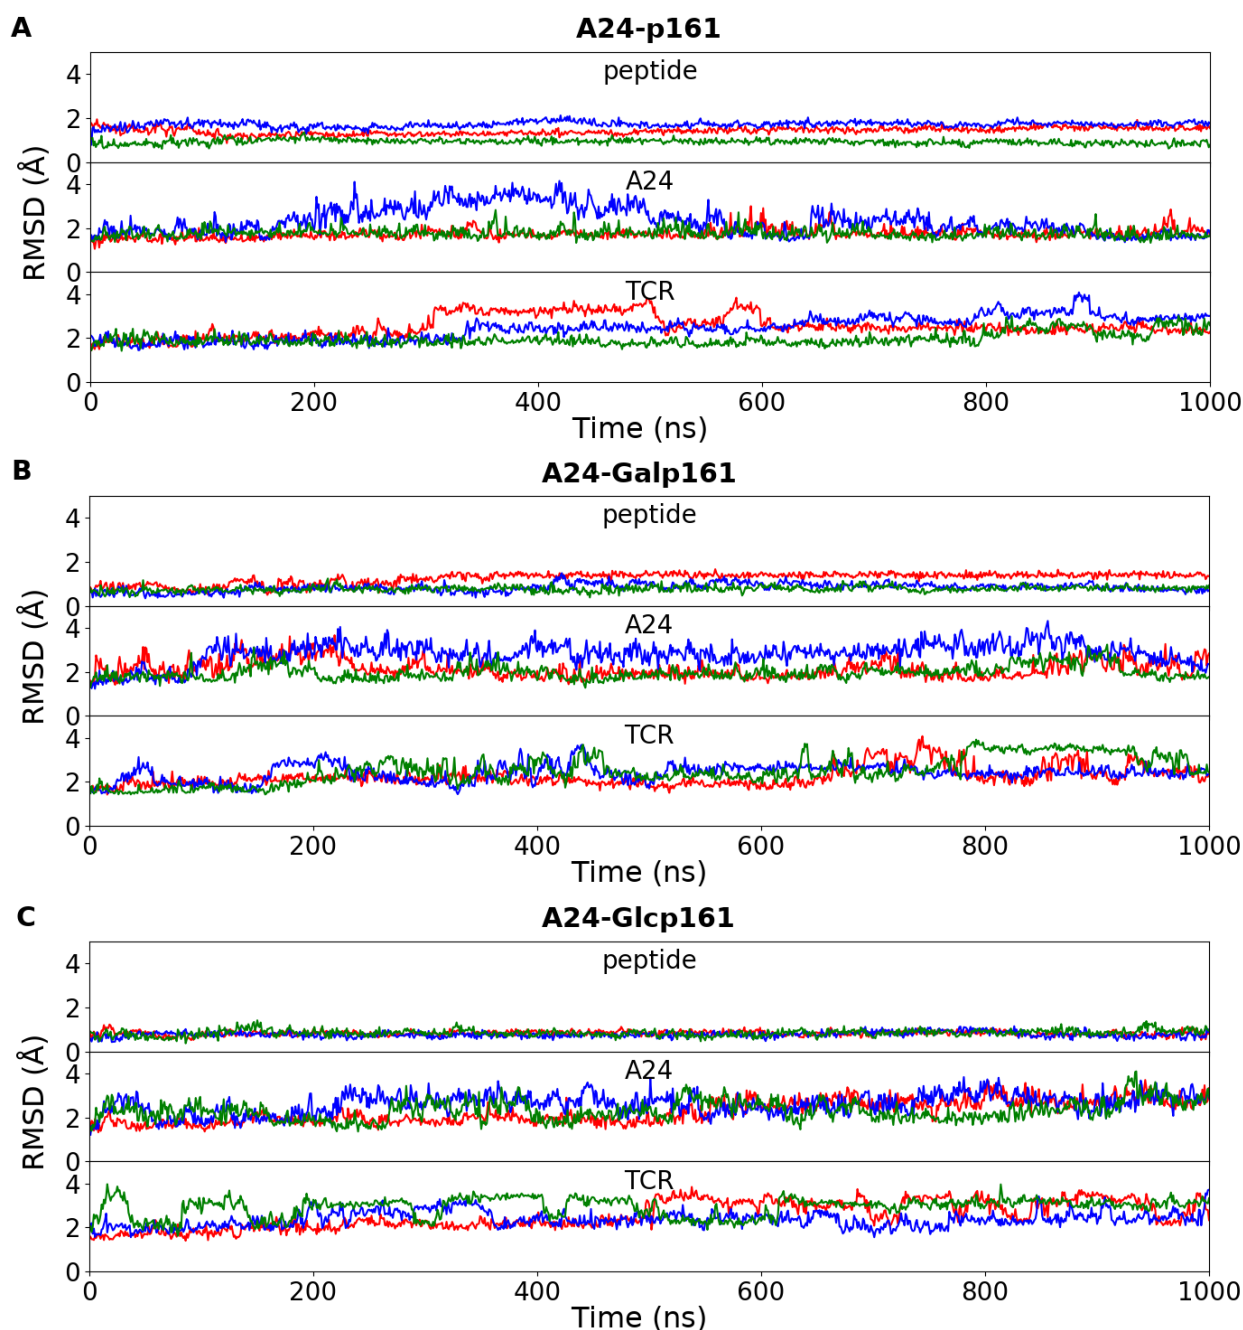

**Figure S8.**  $C^\alpha$  RMSD values of the ternary A24-peptide-TCR complexes during the triplicate 1000 ns MD simulations for: (A) A24-p161-TCR, (B) A24-Galp161-TCR, and (C) A24-Glcp161-TCR. In each of the 3 panels, the RMSD trace corresponds to the peptide (first row), A24 (second row), and TCR (third row). Red, blue, and green colors represent different replicas.



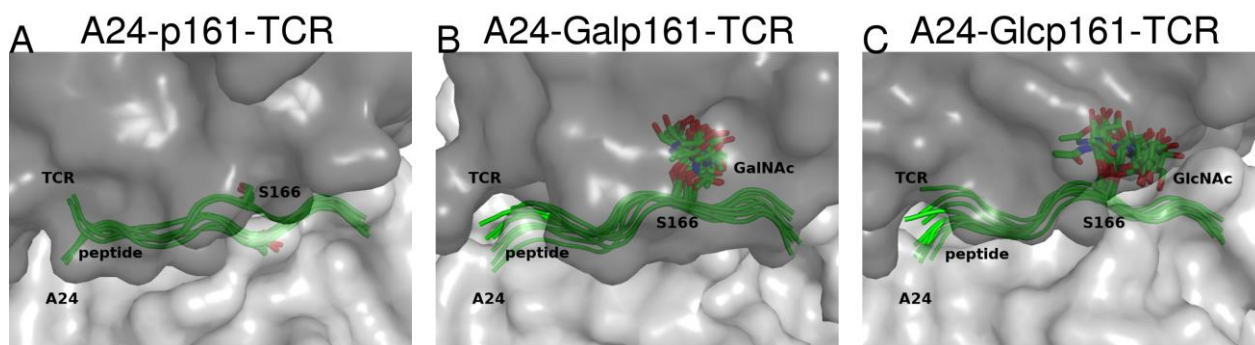

**Figure S9.** Conformations of the p53 peptides sampled during the MD simulations of the ternary A24-peptide-TCR complexes: (A) A24-p161-TCR, (B) A24-Galp161-TCR, and (C) A24-Glcp161-TCR. Each panel shows nine structural snapshots of the peptides extracted at 800, 900, and 1000 ns of each of the triplicate MD simulations. A24 is in grey surface, TCR is in dark grey surface and p53 peptide is in green ribbons. Residue S166 and its glycosylations are shown in sticks with Oxygen atoms in red and Nitrogen atoms in blue.

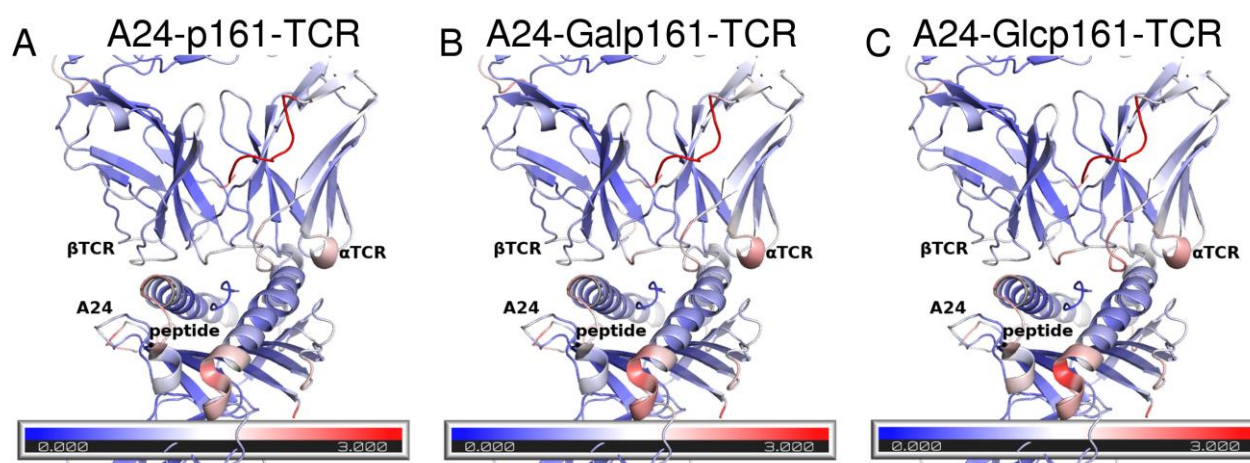

**Figure S10.**  $C\alpha$  RMSF of A24-peptide-TCR complexes: (A) p161, (B) Galp161, and (C) Glcp161 during the last 200 ns of the MD simulations. RMSF values range from very low (blue) to 3 Å (red).

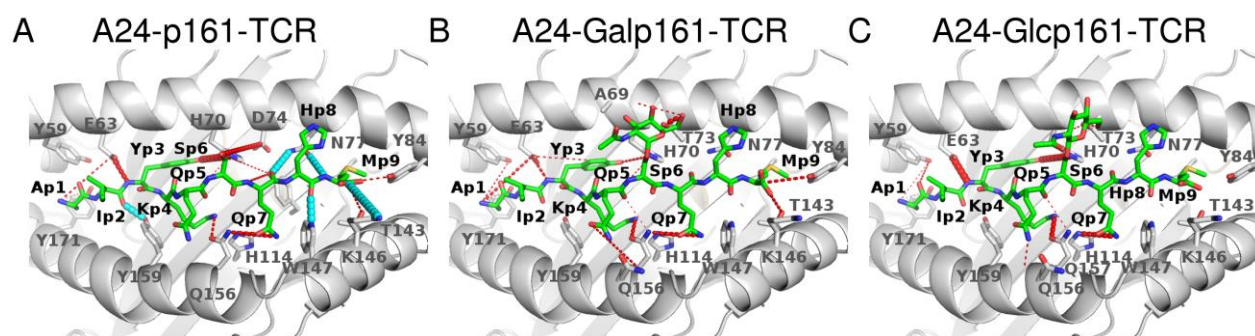

**Figure S11.** Hbond interactions between A24 and peptide residues in the A24-peptide-TCR complexes, where the peptides are (A) p161, (B) Galp161, and (C) Glcp161 during the 800–1000 ns period of the MD simulations. A24 is in grey ribbons, interacting residues are in sticks, while the peptides are in green sticks



with Oxygen atoms in red and Nitrogen atoms in blue. Hbonds that are present in all three complexes with a lifetime >10% are shown as dashed cyan lines in panel (A). They are not shown in the other panels for clarity. The Hbonds that have lifetimes >10% are in dashed red lines. The thickness corresponds to the average lifetime. In the case of multiple hbond donors and acceptors as in Arg and Asp, the atoms between the donor/acceptor atoms are used to show the hbonds.

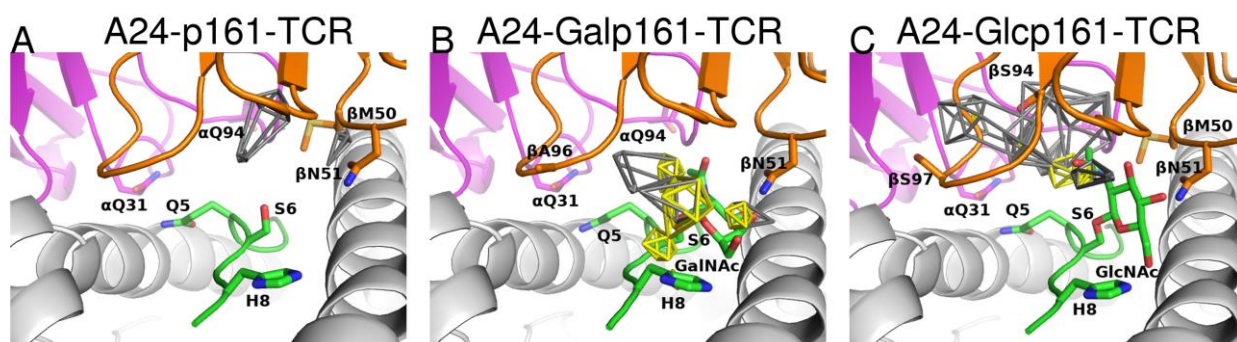

**Figure S12.** Hbond interactions between the peptides and TCR residues in the MD simulations of the A24-peptide-TCR complexes: (A) p161, (B) Galp161, and (C) Glcp161 (C) during the 800–1000 ns period. A24, peptides,  $\alpha$ - and  $\beta$ - chains of TCR are in grey, green, pink, and orange ribbons, respectively. Interacting residues are in sticks, with Oxygen atoms in red and Nitrogen atoms in blue. Residues involving in hbond interactions are in sticks, with Oxygen atoms in red and Nitrogen atoms in blue. Hbonds between peptide and TCR are presented in grey meshes while hbonds between H8 and monosaccharide atoms are presented in yellow meshes. The size of the mesh corresponds to the lifetime of the hbonds.

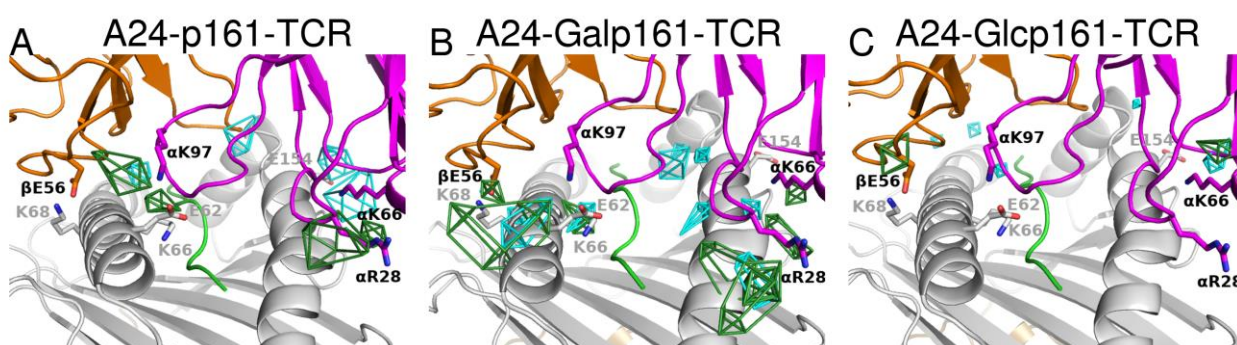

**Figure S13.** Hbond and salt bridge interactions between A24 and TCR residues in the MD simulations of the A24-peptide-TCR complexes: (A) p161, (B) Galp161, and (C) Glcp161 during the 800–1000 ns period. Peptides,  $\alpha$ - and  $\beta$ - chains of TCR are in green, pink, and orange ribbons. Residues involved in salt bridge and hbond interactions are in sticks, with Oxygen atoms in red and Nitrogen atoms in blue. Hbonds are presented as cyan meshes while the salt bridge interactions are presented as green meshes. The size of the mesh corresponds to their lifetimes.
